# Supplementary material for: Postoperative adjuvant TACE for patients of hepatocellular carcinoma in AJCC stage I: friend or foe? a propensity score analysis
Source: PubMed Central journal article supplement (PMC5432288; doi:10.18632/oncotarget.15793), 2017-03-01
Supplement: oncotarget-08-26671-s001.pdf [file oncotarget-08-26671-s001.pdf]

# Postoperative adjuvant TACE for patients of hepatocellular carcinoma in AJCC stage I: friend or foe? a propensity score analysis

## Supplementary Materials

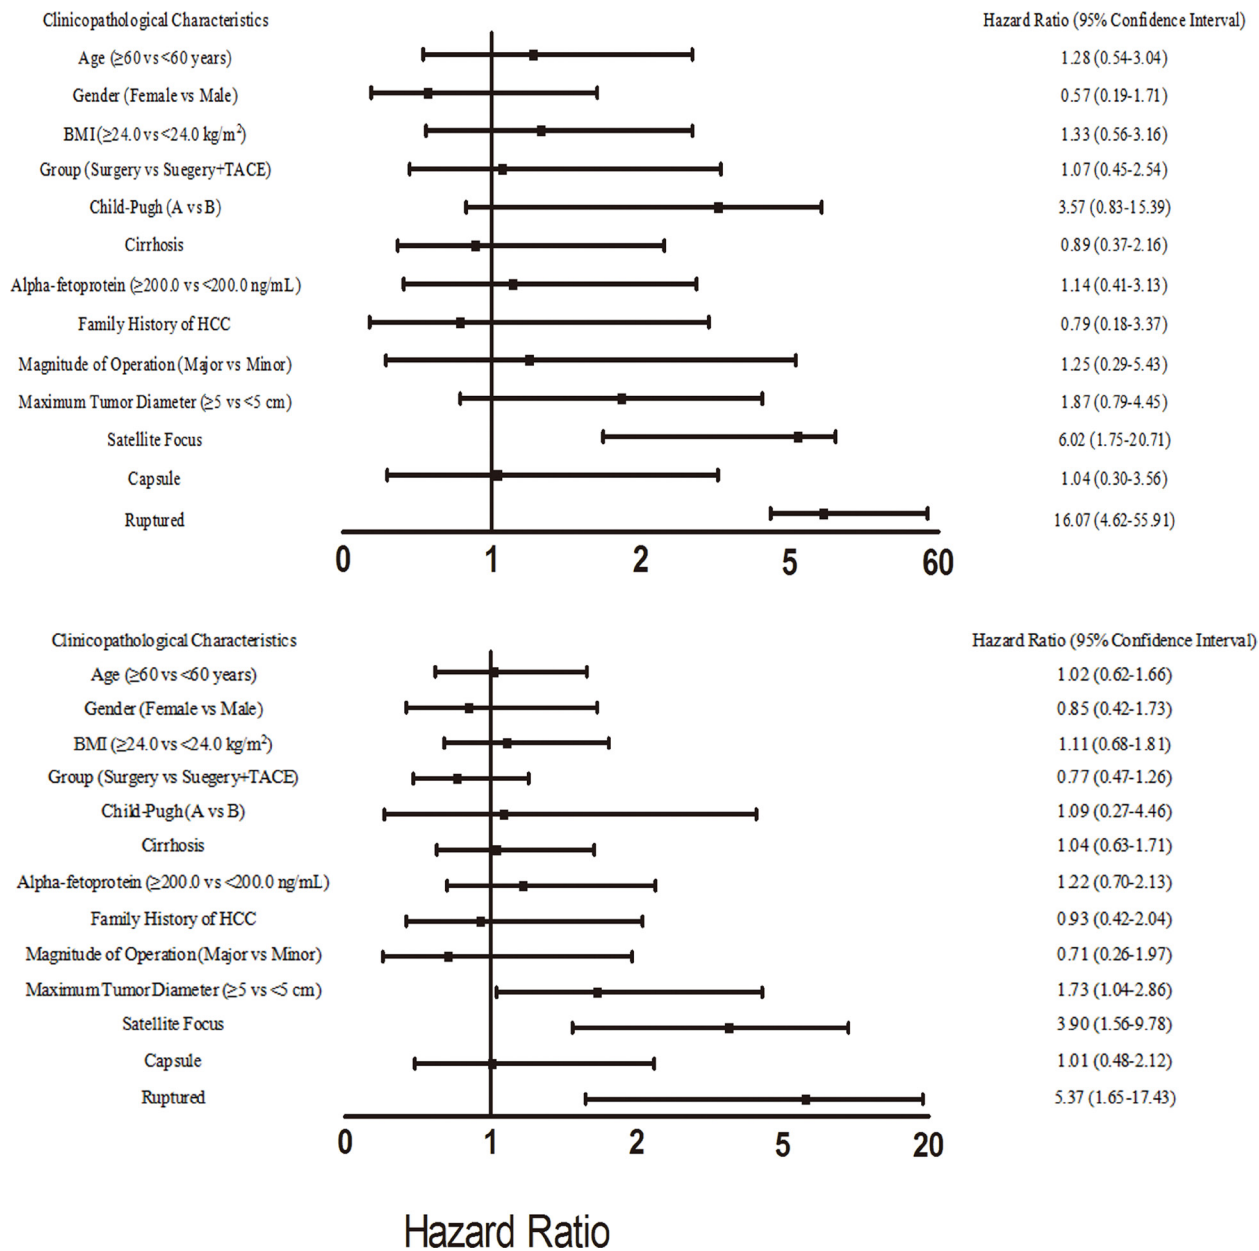

**Supplementary Figure 1: Univariate analysis of survival with cox regression model.** TACE: Transcatheter Arterial chemoembolization; BMI, Body Mass Index; HCC, Hepatocellular Carcinoma; Major resection is defined as equal or more than three segmentectomy; HR, Hazard Ratio.

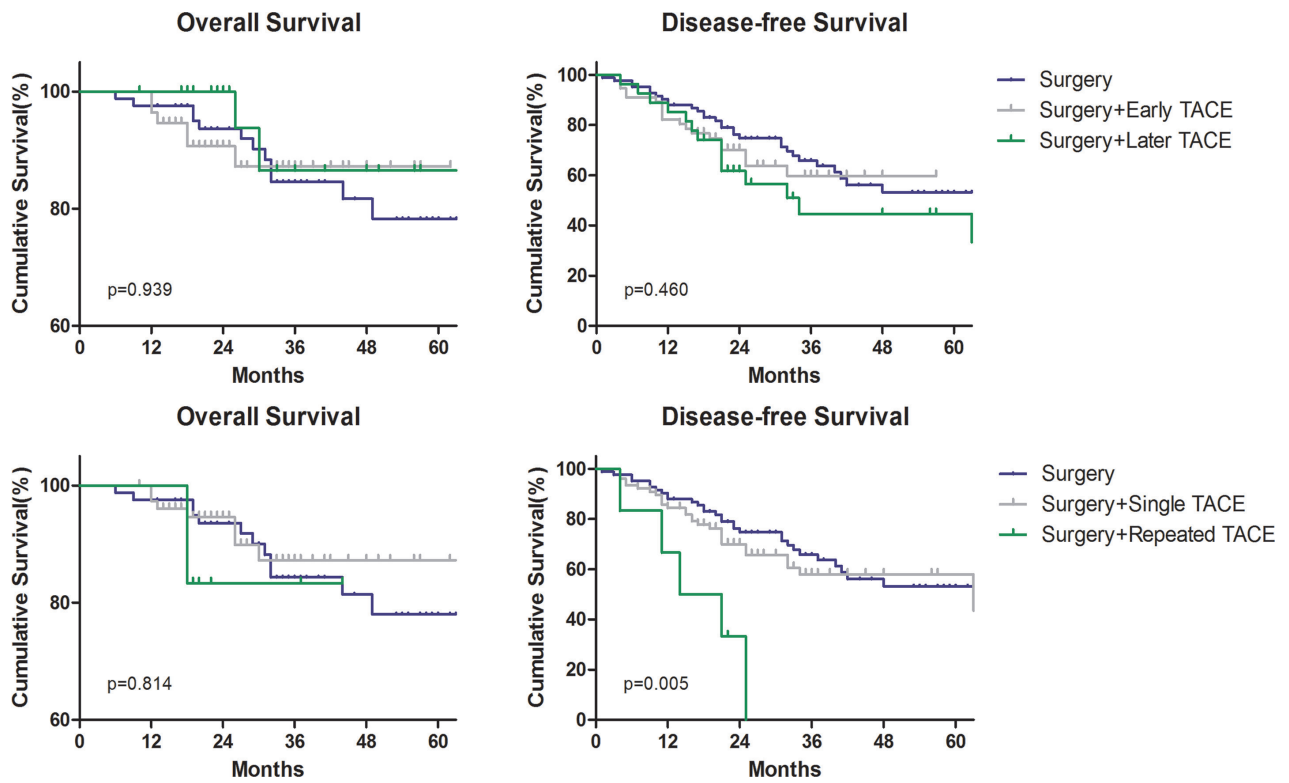

**Supplementary Figure 2: Subgroup analysis of survival with timing and times of TACE.** Overall survival (Upper left) and Disease-free survival (Upper right) for Timing of TACE. Overall survival (Lower left) and Disease-free survival (Lower right) for Times of TACE. TACE, Transcatheter Arterial chemoembolization.

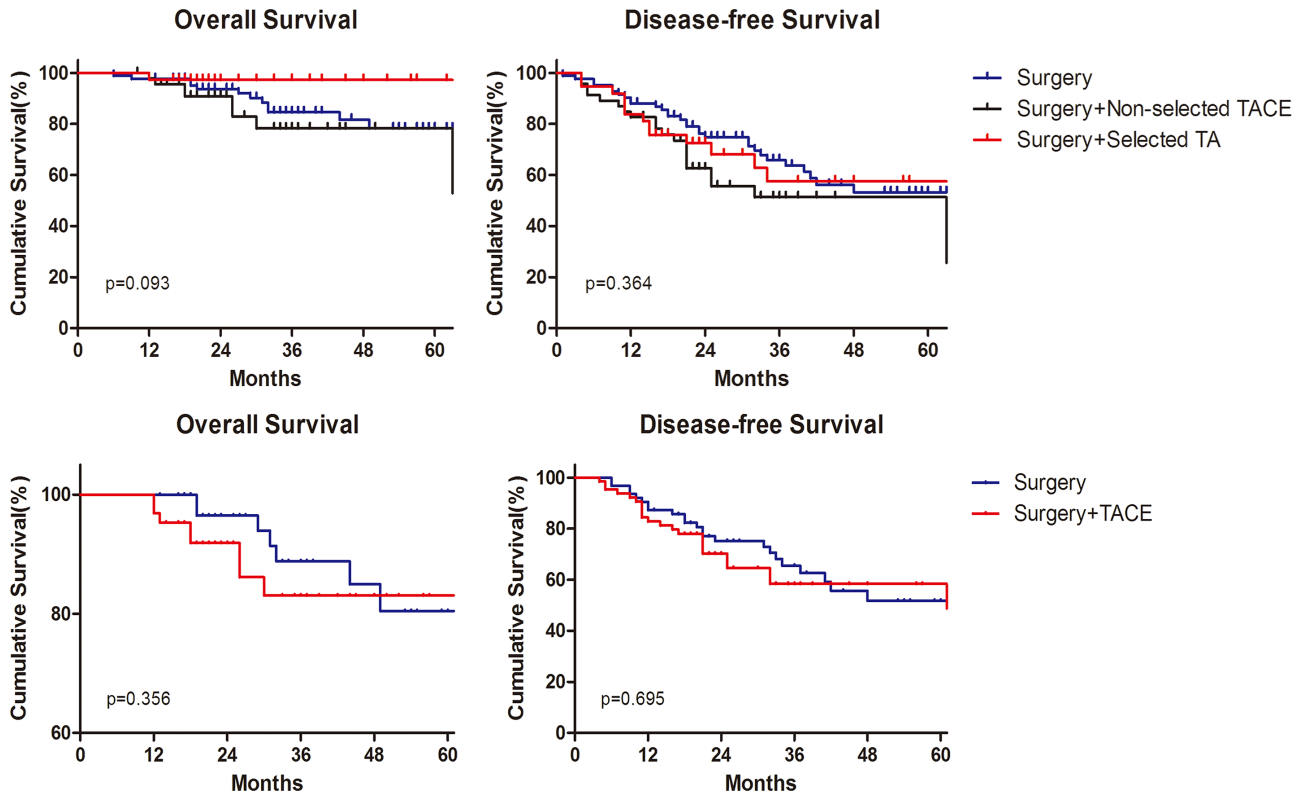

**Supplementary Figure 3: Subgroup analysis for patients with selected or Non-selected TACE and preoperative alpha-fetoprotein < 200 ng/mL.** Overall survival (Upper left) and Disease-free survival (Upper right) for patients with selected or non-selected TACE. Overall survival (Lower left) and Disease-free survival (Lower right) for patients with preoperative alpha-fetoprotein < 200 ng/mL. TACE, Transcatheter Arterial chemoembolization.

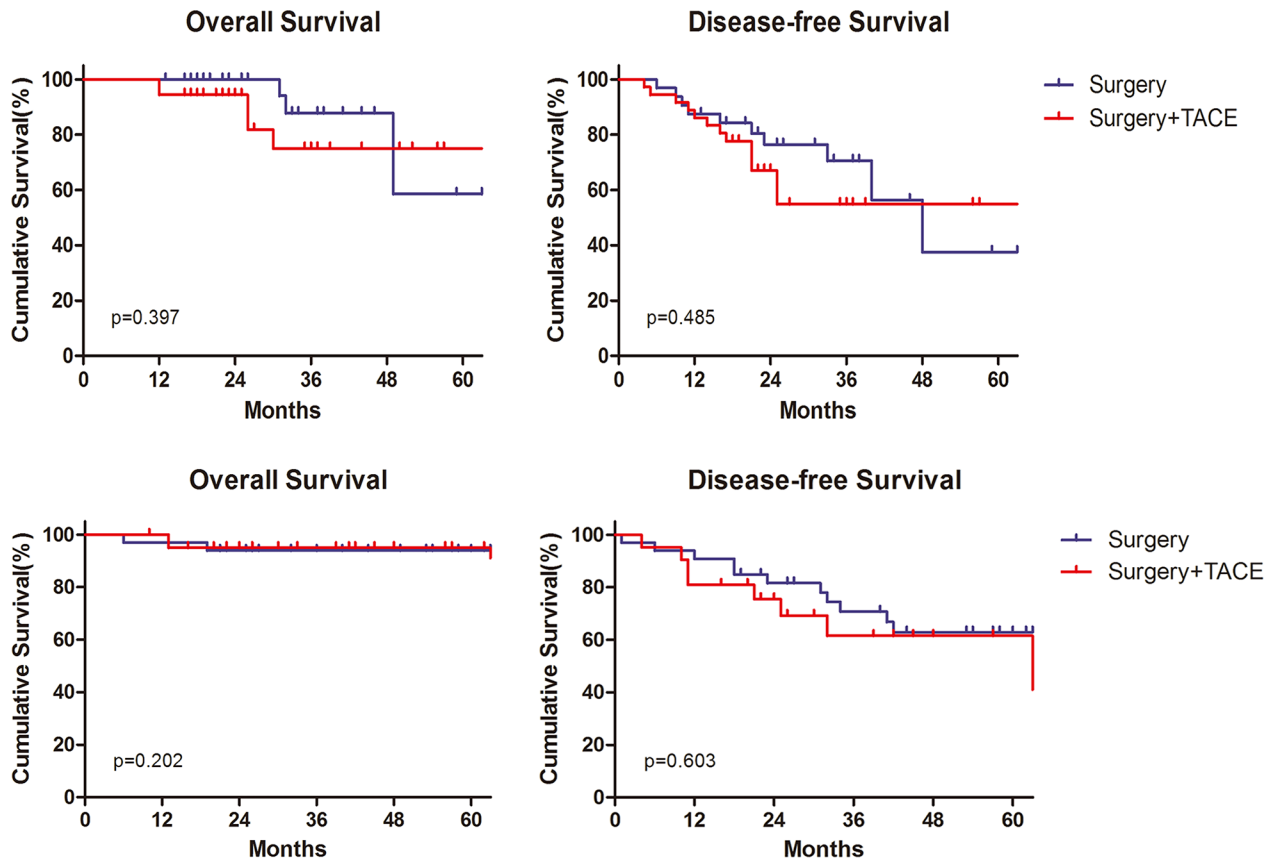

**Supplementary Figure 4: Subgroup analysis for patients with alpha-fetoprotein negative or undetected immunohistochemically.** Overall survival (Upper left) and Disease-free survival (Upper right) for patients with immunohistochemical alpha-fetoprotein negative. Overall survival (Lower left) and Disease-free survival (Lower right) for patients with immunohistochemical alpha-fetoprotein undetected. TACE, Transcatheter Arterial chemoembolization.

**Supplementary Table 1: Clinicopathological characteristics before propensity score matching**

|                             | Surgical Group<br>(n = 91) | Surgical+TACE Group<br>(n = 115) | P-value |
|-----------------------------|----------------------------|----------------------------------|---------|
| Age (years)                 | 63.0 (36–84)               | 39.0 (29–83)                     | < 0.001 |
| Gender (male)               | 78 (85.7%)                 | 100 (87.0%)                      | 0.796   |
| BMI (kg/m <sup>2</sup> )    | 24.2 (17.5–31.6)           | 23.2 (15.4–32.2)                 | 0.330   |
| Serum HBV                   | 67 (73.6%)                 | 101 (87.8%)                      | 0.009   |
| Serum HCV                   | 1 (1.1%)                   | 0 (0%)                           | 0.442   |
| Hemoglobin (g/L)            | 13.9 (8.0–17.1)            | 14.3 (8.9–17.1)                  | 0.113   |
| Prothrombin Time (s)        | 13.4 (11.3–17.5)           | 13.5 (11.7–23.0)                 | 0.639   |
| ALT (IU/L)                  | 28.0 (7–128)               | 36.0 (5–211)                     | 0.015   |
| Albumin (g/L)               | 39.9 (28.2–51.0)           | 40.7 (23.4–50.6)                 | 0.234   |
| Total Bilirubin (μmol/L)    | 15.4 (3.2–50.7)            | 14.8 (3.4–47.9)                  | 0.771   |
| Alpha-fetoprotein (ng/mL)   | 14.7 (1.4–14104.8)         | 18.3 (1.5–50500.0)               | 0.563   |
| Cirrhosis                   | 40 (44.0%)                 | 45 (39.1%)                       | 0.185   |
| HBV-related                 | 35 (38.5%)                 | 43 (37.4%)                       | 0.875   |
| HCV-related                 | 1 (1.1%)                   | 0 (0%)                           | 0.442   |
| Schistosome                 | 4 (4.4%)                   | 1 (0.8%)                         | 0.172   |
| Alcoholic                   | 0 (0%)                     | 1 (0.8%)                         | 1.000   |
| Child-Pugh Grade            |                            |                                  | 0.702   |
| A                           | 87 (95.6%)                 | 112 (97.4%)                      |         |
| B                           | 4 (4.4%)                   | 3 (2.6%)                         |         |
| Family History of HCC       | 8 (8.8%)                   | 16 (13.9%)                       | 0.255   |
| Tumor Location              |                            |                                  |         |
| I                           | 3 (3.3%)                   | 0 (0%)                           | 0.257   |
| II                          | 13 (14.3%)                 | 7 (6.1%)                         | 0.084   |
| III                         | 7 (7.7%)                   | 8 (7.0%)                         | 0.840   |
| IV                          | 15 (16.5%)                 | 13 (11.3%)                       | 0.281   |
| V                           | 17 (18.7%)                 | 23 (20.0%)                       | 0.812   |
| VI                          | 26 (28.6%)                 | 41 (35.7%)                       | 0.281   |
| VII                         | 18 (19.8%)                 | 30 (26.1%)                       | 0.288   |
| VIII                        | 14 (15.4%)                 | 30 (26.1%)                       | 0.063   |
| Maximum Tumor Diameter (cm) | 3.0 (0.9–11.0)             | 2.0 (0.7–11.6)                   | 0.180   |
| Magnitude of Operation      |                            |                                  | 0.311   |
| Major                       | 9 (9.9%)                   | 7 (6.1%)                         |         |
| Minor                       | 82 (90.1%)                 | 108 (93.9%)                      |         |

Values are presented as median (range) or number (percentage). TACE: Transcatheter Arterial Chemoembolization; BMI, Body Mass Index; ALT, Alanine Aminotransferase; HBV, Hepatitis B virus; HCV, Hepatitis C virus; HCC, Hepatocellular Carcinoma. Major resection is defined as equal or more than three segmentectomy.

### Survival rate algorithm

Overall Survival Rate = (1- Mortality) × 100%

Mortality = Deaths/(No. at risk + No. of truncation/2) × 100%

Disease-free Survival Rate = (1- Recurrence Rate) × 100%

Recurrence Rate = No. of recurrence/(No. at risk + No. of truncation/2) × 100%
